# Supplementary material for: A multichannel neural probe with embedded microfluidic channels for simultaneous in vivo neural recording and drug delivery
Source: Royal Society of Chemistry journal article supplement (doi:10.1039/c4lc01321b), 2015-01-01
Supplement: c4lc01321b1.pdf [file c4lc01321b1.pdf]

SUPPLEMENTARY INFORMATION

**A multichannel neural probe with embedded microfluidic channels for simultaneous *in vivo* neural recording and drug delivery**

Hyunjoo J. Lee<sup>a</sup>, Yoojin Son<sup>a,b</sup>, Jeongyeon Kim<sup>c</sup>, C. Justin Lee<sup>c</sup>, Eui-Sung Yoon<sup>a</sup>, and Il-Joo Cho<sup>a,\*</sup>

<sup>a</sup> Center for BioMicrosystems, Brain Science Institute, Korea Institute of Science and Technology (KIST), Seoul, Korea.

<sup>b</sup> School of Electrical Engineering, Korea University, Seoul, Korea.

<sup>c</sup> Center for Neuroscience, Brain Science Institute, Korea Institute of Science and Technology (KIST), Seoul, Korea.

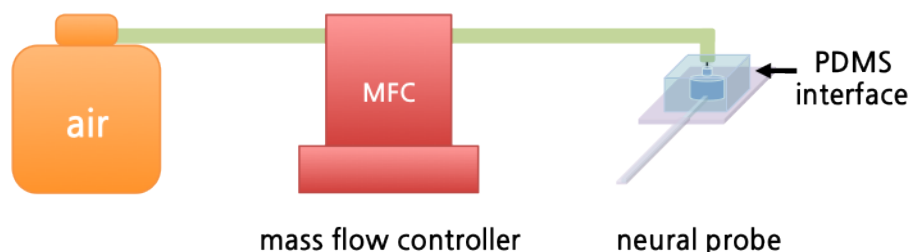

Fig. S1 Schematic of the pressure-driven injection system used to inject drugs *in vivo*.

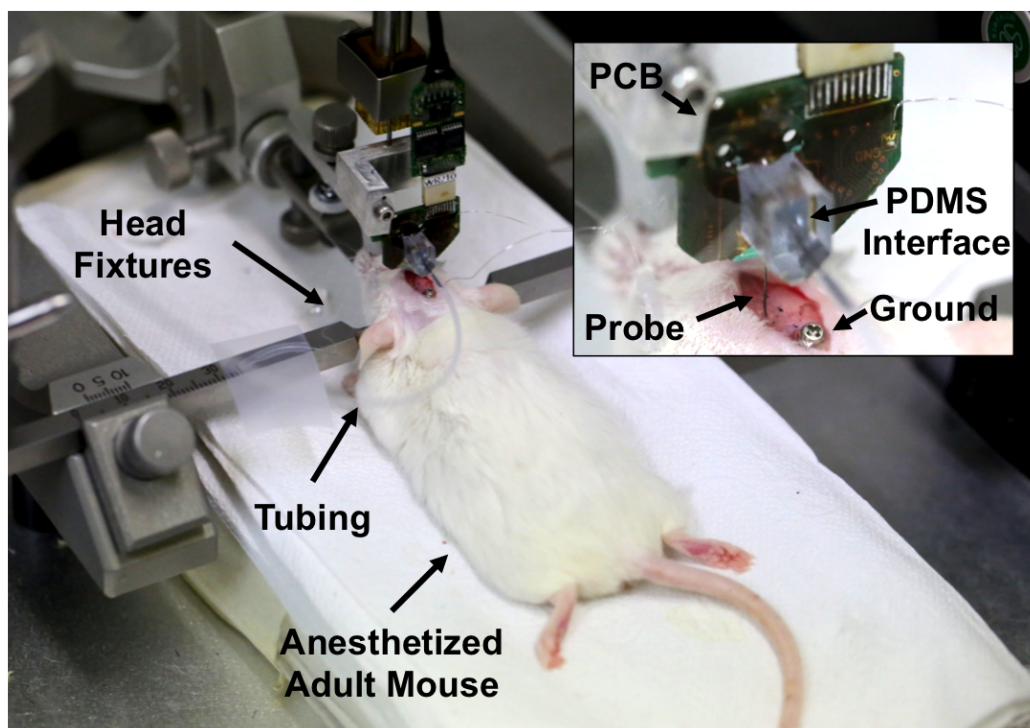

Fig. S2 Mouse *in vivo* experimental setup showing the stereotaxic frame, Neuralynx connector and board, ground screw, and packaged neural probe.

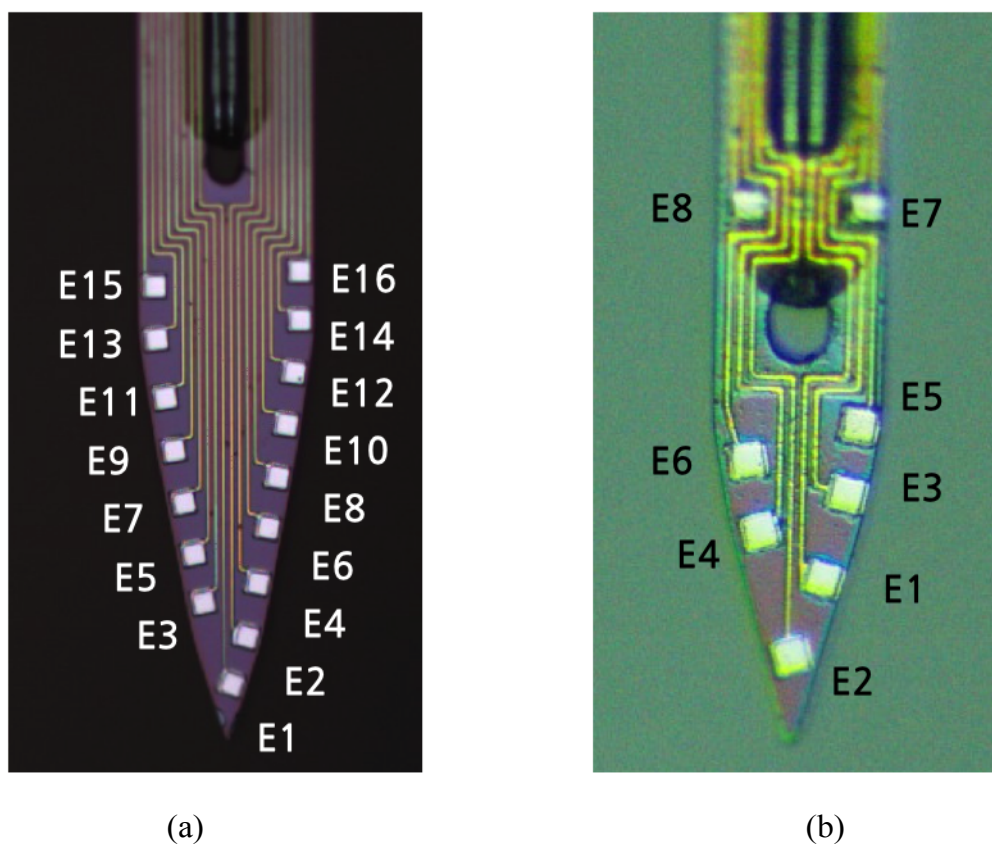

Fig. S3 Optical pictures of (a) probe with 16 microelectrode used in the first *in vivo* experiments and (b) probe with 8 microelectrode used in the second *in vivo* experiments.
